# Supplementary material for: Linkage of catalysis and 5′ end recognition in ribonuclease RNase J
Source: PubMed Central journal article supplement (PMC4652760; doi:10.1093/nar/gkv732), 2015-08-07
Supplement: supp_gkv732_nar-01315-z-2015-File011.pdf [file supp_gkv732_nar-01315-z-2015-File011.pdf]

TT 10 20 30 40 50 TT  
 1 10 20 30 40 50 60  
 S.coelicolor MSHPPELGRPPALPKGGIRTP LGGGCEIGRNNITVFEYGGRLIVDQVLFPEEQFGT  
 B.subtilis\_J1 MKFVKND.....QAVFALGGGCEIGRNTYAVQFDDEIVLIDAKIFPEDELLEGI  
 B.subtilis\_J2 MKKKNTE.....NVRHIALGGGCEIGRNLVIEIDSDIFVVDAGLHMPNEMLGI  
 T.thermophilus MSHHHHHSQGG.PQDHVEIPLGGGCEIGRNTVFRFRDIEFVLDGGGLAFPEGMFPGV  
 D.radiodurans MTNPEQFRPESADLPAPTLEVIPLGGGCEIGRNTVFRVYGDIEVVDGGGLAFPEKAHQMGV

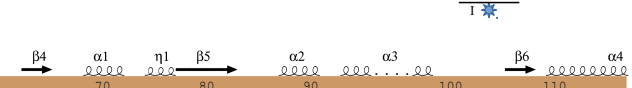

beta4 alpha1 eta1 beta5 alpha2 alpha3 beta6 alpha4  
 70 80 90 100 110  
 S.coelicolor DHIIPDFTSIRDRLDDEIGVLTTHGHBDHIGGVPE...LLREKPDTPFISGRLLTALIE  
 B.subtilis\_J1 DVIYDPDYTYLVKNEEDKIKGLFTHGHBDHIGGVPE...LLRQVNIIFYVGGRLAIGLLR  
 B.subtilis\_J2 DVIYDPDYSYLIERADRVKAIPLTHGHBDHIGGVPE...LLRKLSDVYVGGRLAIGLLR  
 T.thermophilus DILFRVYLIEHRKIKAWVLTTHGHBDHIGGVPE...LLFMIFGKESDVFLLGLDR  
 D.radiodurans DVIYPRIDVYLLSHQDKIKGWLTHGHBDHIGGVPE...IFARLPRVYVYGLLALVLR

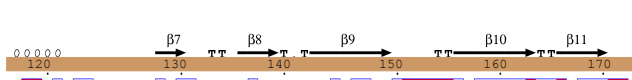

00000 beta7 beta8 beta9 beta10 beta11  
 120 130 140 150 160 170  
 S.coelicolor AKLQHRIRF...YTLVVAEGHRERVGF.PFDCEVAVNHSTPDAALAVAIRPACMVVHTG  
 B.subtilis\_J1 NKLDEHGLLR.QTKNIIIGEDDVKFR.KTAVSFRHTSTPDSYGVVKKPFPNIVHTG  
 B.subtilis\_J2 RKLKQYGHNR.KTDLRRIHKSIVTFE.STKVSFRHTSTPDSYGVVSKTSLGIVHTG  
 T.thermophilus CKLRFELRFGAFNLKEISPDRIQVGRYFTLDFRMTSTPDSYGVVIRIHTIVHTG  
 D.radiodurans HKLSEFLQD.VDLEVVTYGDEVRFGQSFVVEFCMTHSTPDAAYILKTEVGVVHTG

alpha5 beta12 alpha6  
 180 190 200 210 220 230  
 S.coelicolor DFKMDQLP...LDGRITDHAFAFLSEEGDITLADSTNAEVPGFVFPARDISNVLRQVFA  
 B.subtilis\_J1 DFKMDQPT...VGEFANLTKMAETGKRGVLCLESDNSNPEFTMSERRVGEIHDIFR  
 B.subtilis\_J2 DFKMDQPT...ALNQTCDIGETAKIIGSDNSNPEFTMSERRVGEISDALLY  
 T.thermophilus DFKMDQPT...FDGKVSHEAKVLAQAGAEGLLADANAEVRFHAKELDRVIG  
 D.radiodurans DFKMDPVDVIGAGIVSDLERVEQAGKGVLLISDSTNAEVPHTPSEAEIARNLEDEIK

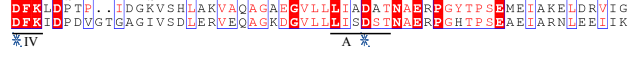

beta13 alpha7 beta14 alpha8 TT  
 240 250 260 270 280 290  
 S.coelicolor NARRKTIIVAFASHVHRHQIILDAHEYGRVAVFCRSMVNRNMTIARDQVYLVKPPGLVY  
 B.subtilis\_J1 KVDGRIFIAVAFASNIHRHQVIEAAVQNGRKYAVFCRSMESALIEIGQTCYINCPKNTFI  
 B.subtilis\_J2 NSQNRVIAVAFASNIHRHQVIEAAVQNGRKYAVFCRSMESALIEIGQTCYIEADDELFI  
 T.thermophilus RAPGRVFTVAFASHVHRHQVIEAAVQNGRKYAVFCRSMELKFSRIALDGLKVKD.RLY  
 D.radiodurans GCRGRVFTVAFASHVHRHQVIEAAVQNGRKYAVFCRSMIKYQAQAQATGMLNPFPEFI

eta2 eta3 beta15 alpha9 beta16  
 300 310 320 330 340  
 S.coelicolor DVKTLDDLPDSBVLVCTGSGQEPMAALRRANRDH.QIRIVNGDVTILASLTPGNENA  
 B.subtilis\_J1 EHNIEINRMPANKVTLCTGSGQEPMAALRRANRDH.QIRIVNGDVTILASLTPGNENI  
 B.subtilis\_J2 SVQVVKRKRFRVIAVAFASNIHRHQVIEAAVQNGRKYAVFCRSMELKFSRIALDGLKVKD  
 T.thermophilus TLEEVKLDLPHQVLLILASGSGQEPMSVLRHAFEGHAKMALKGDVTILASLTPGNENA  
 D.radiodurans TSEVYGLLQDQVLFVCTGSGQEPMAVLRRAFGTHARKLILRRGDVTILASLTPGNENA

alpha10 beta17 alpha11 beta18 alpha12  
 350 360 370 380 390 400  
 S.coelicolor VYRVINGLTRKCANVYHKKNAKVVHSGHSAAGELLYFYNTCRPKNLMPEVHGWRHIDRANA  
 B.subtilis\_J1 VSRITINOLYRACAEVYHGLPNDHHTSGHGGQEQKLMRLIKPKFMPHGHCEYRMRQKMHV  
 B.subtilis\_J2 YSKVTVDLARAQVYFAQKR.VHSGHGSQBELKLMINLLPKYVLPVNGEYRMRQKMS  
 T.thermophilus VNRVINRLYALGAVYHPPYTYKVVHSGHSAQBELKLLINLTPRFELPWHGEBRHMNFK  
 D.radiodurans VNLIVNRLYELGVDVYPPYTYKVVHSGHSAQBELATLNLTPRFELPWHGEBRHMNFK

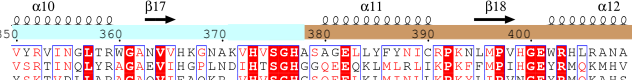

410 420 430 440 450 460  
 S.coelicolor ELGALTVFHDRIVITARDGVVVDIVVEGKAKITGKVAQGVYVVDGLSVGVDVGEPAKDRRI  
 B.subtilis\_J1 KLAIDCGIPEENCFIMDNEVLLALKGDEAVVAKIPGGSVYDGLSGIGDIGNIHRDRI  
 B.subtilis\_J2 WLAESMSRPEKTLIGENAVYRITRETFEKVGEVPHVLYVVDGLGVGDITEEIADRHH  
 T.thermophilus KLAQTLREPEKRTLIAKNGLVNLGPDEFVSGTVAAGAVYVVDGLGVGDVNDVLDLDRVN  
 D.radiodurans

470 480 490 500 510 520  
 S.coelicolor LGDRGISVIVVMSSTGKITGGHVVQARGSGTEDSAFAVLPKRVTEALERSAQDGVVEP  
 B.subtilis\_J1 LSEHGLVIVVSDMDDFKISAGFDLISRGFVYMRSEGLDINDAQELISNHQKVMERKT  
 B.subtilis\_J2 LSQDGLIVVITLDKQKHLVSGPEITIRGFVYVRESGLIVQATELVRISVTEATETSN  
 T.thermophilus MAERGLVVIITALLAGED.....HVVVVSRGFVAGERLLGVRMALEALRNGVREK  
 D.radiodurans LSQDGLLITAVLHPT.....HVVVVSARGFAPNRDLELQIRRVVLEAVEQGLREK

530 540 550 560  
 S.coelicolor HQMQQL...TRRTDGNVSDTYRNRPMIHPVVVEV  
 B.subtilis\_J1 TQWSEIKNEITDITLAPFLYEKTKRRPMIHPIMEV  
 B.subtilis\_J2 VEWSTLQAMRDALNQFLYEKTKRRPMIHPIMEV  
 T.thermophilus KPLERINDDIYYPVKKKATGRDPMIHPVVEG  
 D.radiodurans KRLEDVDDMYGAVRRFTRKATGRDPMIHPVVEG
